# Supplementary material for: Connecting omics signatures of diseases, drugs, and mechanisms of actions with iLINCS
Source: bioRxiv or medRxiv preprint supplement (doi:10.1101/826271), 2020-11-08
Supplement: Supplementary file [file media-7.pdf]

# Use case 3: Proteo-genomics analysis of cancer driver events in breast cancer

The use case describes the analysis of TCGA breast cancer RNA-seq and RPPA data using the iLINCS “Datasets” workflow to construct and analyze the differential gene and protein expression signatures contrasting Luminal A and Her2 enriched (Her2E) breast tumors. The analysis results are depicted in the Figure. A) Most differentially expressed proteins in the proteomics signatures constructed by comparing RPPA profiles of Her2E and Luminal A BRC samples; B) Gene expression profile of the genes corresponding to proteins in A) based on RNA-seq data; C) Top 100 CP signatures most connected with the transcriptional signature constructed by comparing RNA-seq profiles of Her2E and Luminal A samples; D) Selected chemical perturbagens and their targets for CP signatures in C).

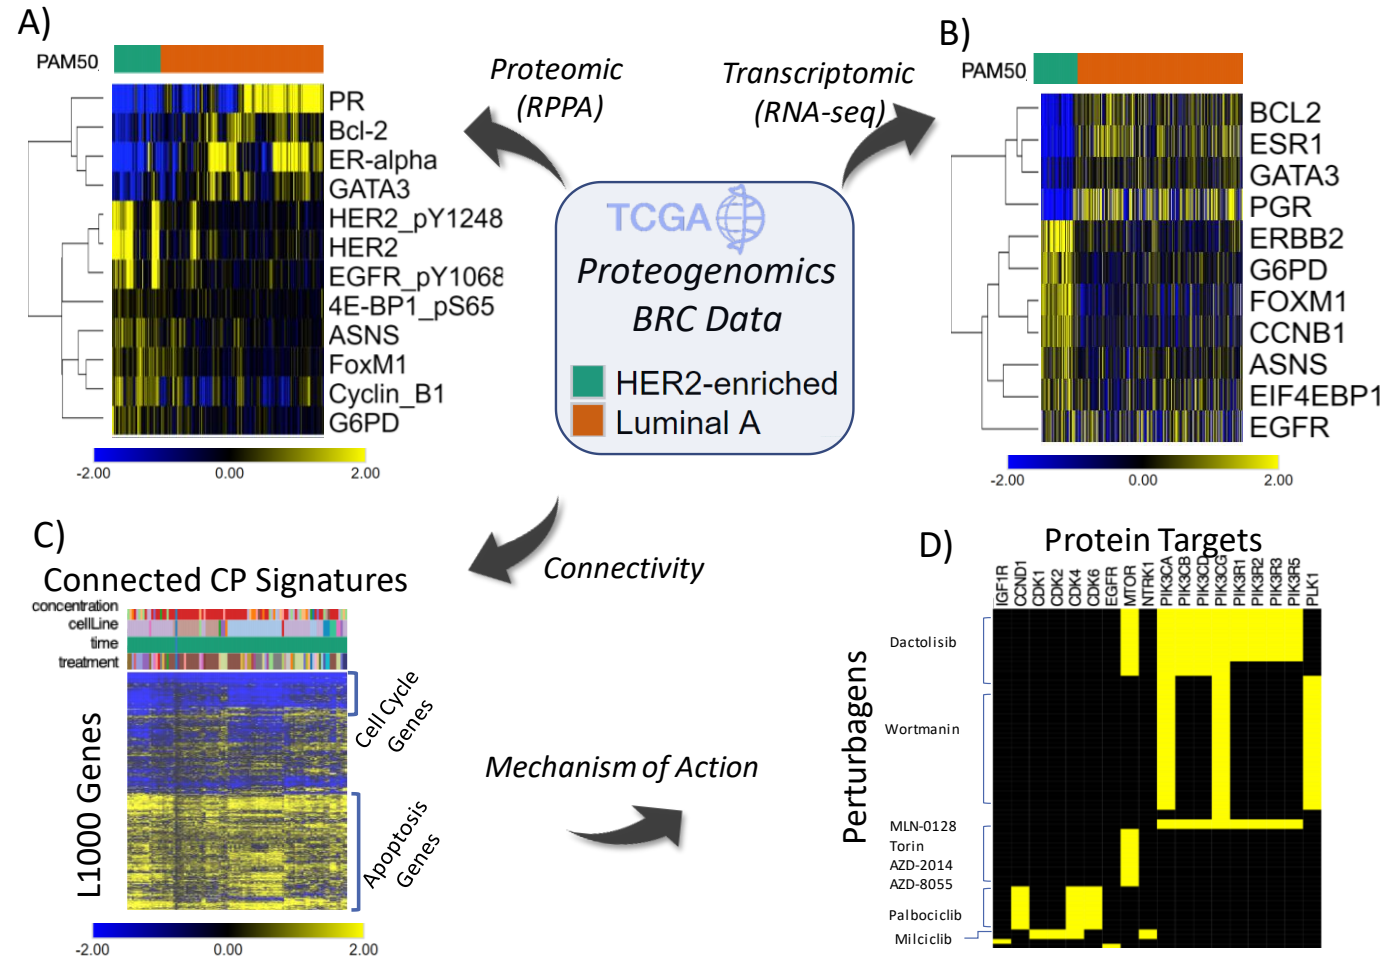

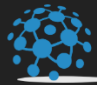

1. Click "Datasets" tab on the top of iLINCS homepage to start with the "Datasets" workflow. The workflow allows you to select a dataset and create a differential expression gene/protein signature.

## Datasets

All Datasets

LINCS Datasets

### Find Genomics Datasets

Organism

All

Sample Type

All

Data Type

All

Collection

All

Keyword

Search

Search in portals...

Search

Name

Description

**LINCS**

Datasets generated by LINCS data and signature generation centers

Choose

**TCGA**

Gene expression (RNASeqV2), protein expression (RPPA), and copy number variation data generated by TCGA project

Choose

**GDS**

Gene Expression Omnibus Datasets (GDS)

Choose

**Cancer**

Cancer related genomics datasets

Choose

2. To browse TCGA datasets click "Choose" button.

|       |      |                                                                                                                               |                        |         |
|-------|------|-------------------------------------------------------------------------------------------------------------------------------|------------------------|---------|
| human | TCGA | 937 RPPA breast invasive carcinoma (BRCA) samples from TCGA project. Data were downloaded via TC-GAbi... <a href="#">More</a> | ID=TCGA_BRCA_RPPA_2019 | Analyze |
| human | TCGA | 309 RNA-seq cervical squamous cell carcinoma and                                                                              |                        | Analyze |

3. Select the BRC RPPA dataset for the analysis.

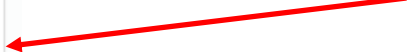

Select dataset / Dataset Info and Analysis

## Explore and analyze dataset TCGA\_BRCA\_RPPA\_2019

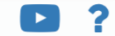

**Dataset Analysis**

- Create a Signature >>
- Multi-group Analysis >>
- Analyze a list of Genes >>

**Dataset Info**

**Description**  
937 RPPA breast invasive carcinoma (BRCA) samples from TCGA project. Data were downloaded via TCGAAbiolinks. Deleterious mutations in TCGA-BRCA driver genes were from MAF aligned against hg19. Mutation impact categories were defined by VEP from MAF aligned against hg38.

**Assay type:** RPPA      **Data:** Proteomics  
**ID:** TCGA\_BRCA\_RPPA\_2019      **Organism:** human

**Reference**

4. To create signature.

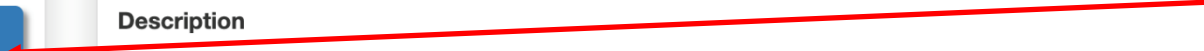

Exploratory tools Data and metadata

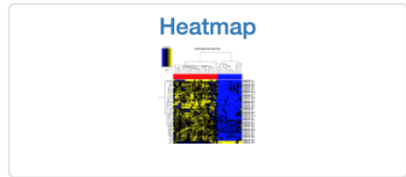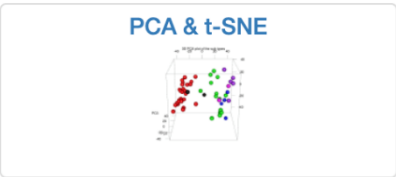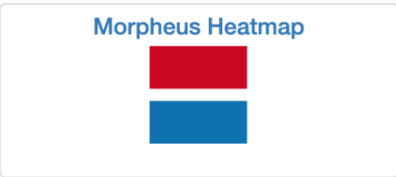

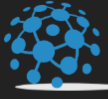

## Creating a signature using TCGA\_BRCA\_RPPA\_2019

### Select grouping variable

PAM50\_mRNA

treatment: Luminal A

baseline: HER2-enriched

Create Signature

### Dataset Info

### Histogram

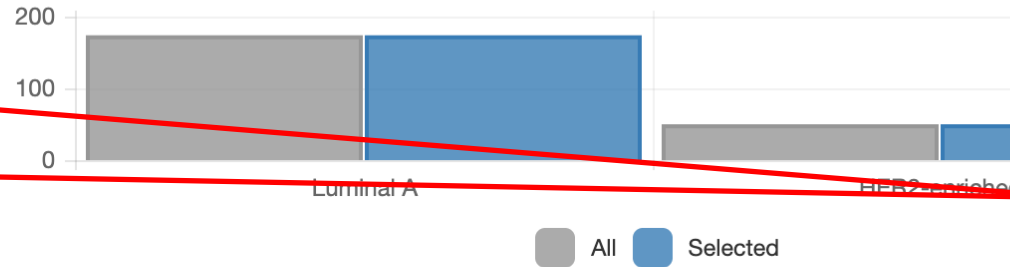

5. Select the sample property (ie factor) that will be used to construct two groups of samples for signature creation

6. Select the value of the factor that will indicate treatment and baseline sample groups

Filter Samples

7. Create differential protein expression signature between treatment and baseline samples

### Signature created from dataset TCGA\_BRCA\_RPPA\_2019

#### Signature analysis

Modify the list of selected genes >>

Other analyses with selected genes >>

#### Dataset Info

#### Signature Info

Download

|                                    |     |                         |     |                        |    |
|------------------------------------|-----|-------------------------|-----|------------------------|----|
| Number of Samples after Filtering: | 224 | Probes after Filtering: | 100 | Genes after Filtering: | 86 |
| <b>Sample Grouping Factor</b>      |     | <b>Treatment</b>        |     | <b>Baseline</b>        |    |
| PAM50_mRNA                         |     | Luminal A               |     | HER2-enriched          |    |
| <b>Number of samples</b>           |     | 174                     |     | 50                     |    |

8. Click here to select different set of differentially expressed proteins (by default, 100 most statistically significant proteins are selected)

Signature in the form of the table and connectivity analysis tabs to connect to iLINCS signatures and perturbations

#### Analysis Results

Signature Data

Connected Signatures

Connected Perturbations

- FTreeView Analysis
- Heatmap
- PCA & t-SNE
- Pathway Analysis
- Enrichment Analysis
- DAVID
- TopFun
- GeneMANIA
- Reactome
- Morpheus Heatmap
- Clustergrammer
- PINET
- L1000CDS2
- L1000FWD
- X2K
- X2Kweb
- SigNetA

Various internal and external applications that can be used to further analyze the 100 gene signature

### Modify the list of selected genes

Select differential expression range:

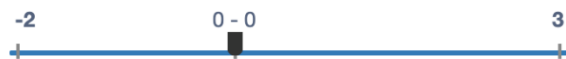

Select Pvalue Cutoff:

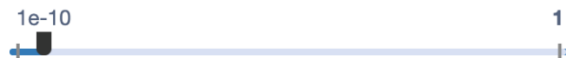

Chosen 12 out of 263 total genes in signature.

Analyze

Cancel

Legend:

- Selected Genes
- Genes below P Value Cutoff
- Genes below Diff Exp Cutoff
- Genes below both Cutoffs

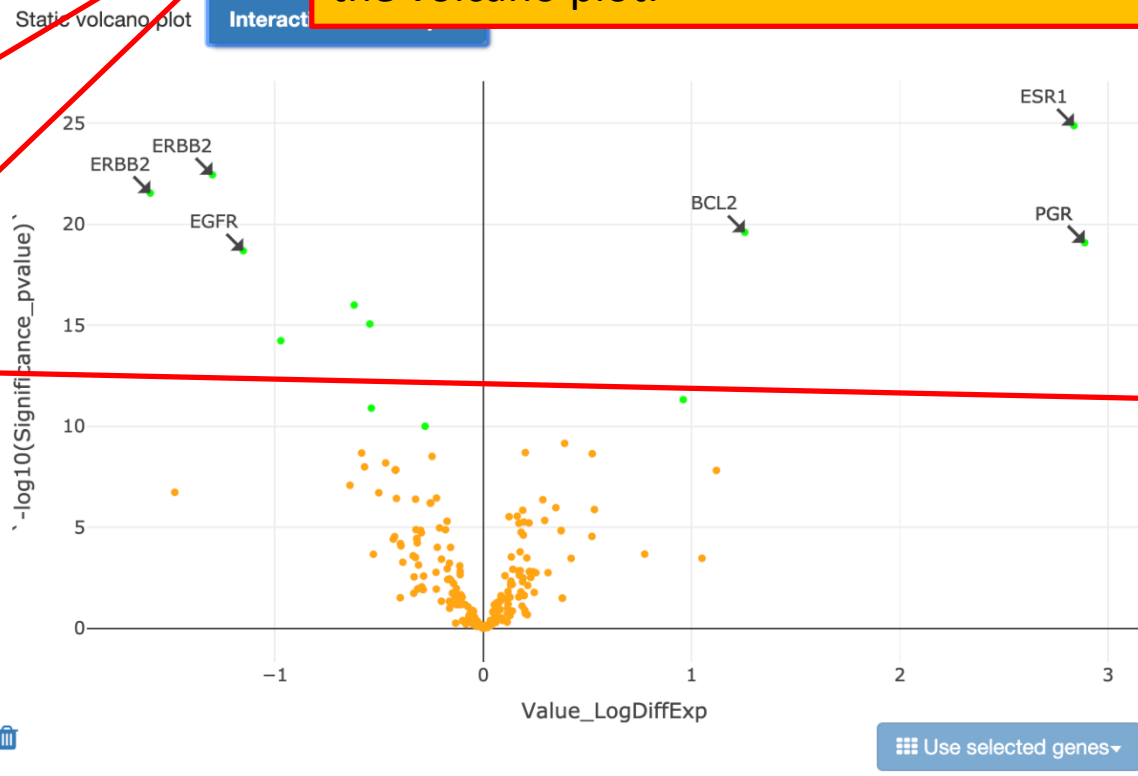

9. Use sliders to select differentially expressed with  $p\text{-value} < 10e-10$  that with increased expression in Her2E samples. Since Her2E samples were used as baseline samples, these  $\log_2$  differential expression of these proteins will be less than zero proteins. You can also click and label individual proteins in the volcano plot.

10. Click analyze to use the selected 12 proteins in further analyses

L1000CDS2

L1000FWD

X2K

SigNetA

Signature created from dataset TCGA\_BRCA\_RPPA\_2019

**Signature analysis**

Modify the list of selected genes >>

Other analyses with selected genes >>

**Dataset Info** **Signature Info** Download

Number of Samples after Filtering: 224  
 Probes after Filtering: 12  
 Genes after Filtering: 11

Pvalue cut off: 1e-10

| Sample Grouping Factor | Treatment | Baseline      |
|------------------------|-----------|---------------|
| PAM50_mRNA             | Luminal A | HER2-enriched |
| Number of samples      | 174       | 50            |

**Analysis Results** Signature Data Connected Signatures Connected Perturbations

FTreeView Analysis Heatmap PCA & t-SNE Pathway Analysis Enrichment Analysis DAVID

ToppFun GeneMANIA Reactome **Morpheus Heatmap** Clustergrammer PiNET

11. Click to view the heatmap of the 12 proteins in the analysis of the corresponding RNA-seq dataset

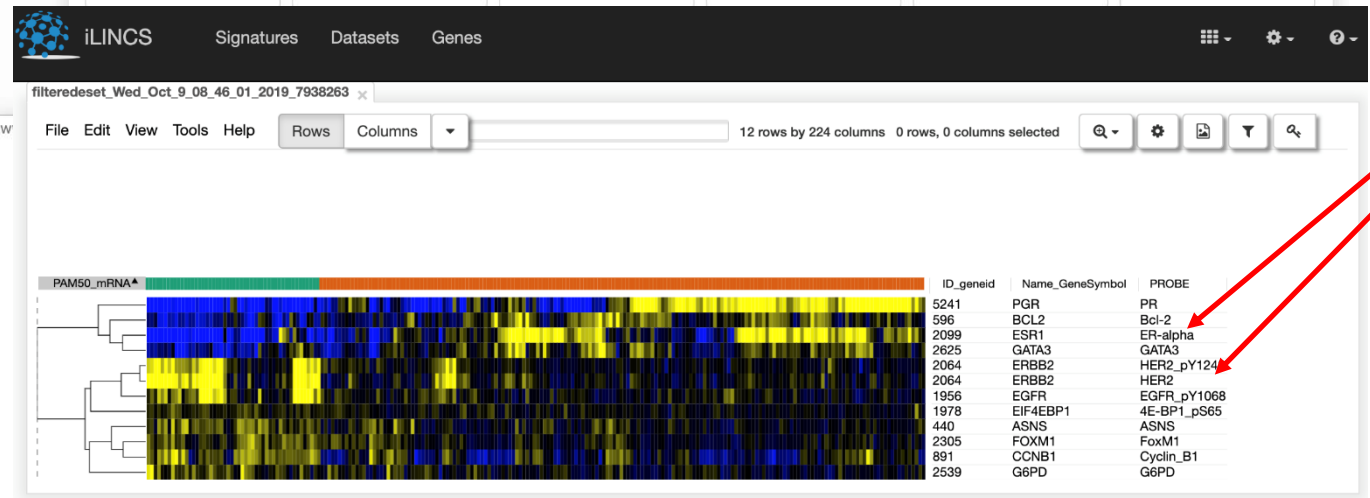

Most differentially expressed proteins are known drivers of Her2E and Luminal A BRC subtypes

Use Case 3: Proteo-genomics analysis of cancer driver events in breast cancer



### Signature created from dataset TCGA\_BRCA\_RPPA\_2019

#### Signature analysis

- Modify the list of selected genes >>
- Other analyses with selected genes >>

#### Dataset Info Signature Info

Number of Samples after Filtering: **224** Probes after Filtering: **12** Genes after Filtering: **11**

P value cut off: **1e-10**

| Sample Grouping Factor   | Treatment | Baseline      |
|--------------------------|-----------|---------------|
| PAM50_mRNA               | Luminal A | HER2-enriched |
| <b>Number of samples</b> | 174       | 50            |

13. Click to proceed with the analysis of the corresponding RNA-seq dataset using selected 12 genes

12. Interactive box plot for distribution of sample expression levels

#### Analysis Results

#### Signature Data

#### Connected Signatures

#### Connected Perturbations

Show complete signature (263)

Show selected genes (12)

| Probe ID    | Gene ID | Symbol | Differential Expression | P Value |
|-------------|---------|--------|-------------------------|---------|
| ER-alpha    | 2099    | ESR1   | 2.836                   | 1.3e-25 |
| HER2_pY1248 | 2064    | ERBB2  | -1.300                  | 3.6e-23 |
| HER2        | 2064    | ERBB2  | -1.599                  | 2.9e-22 |
| Bcl-2       | 596     | BCL2   | 1.255                   | 2.5e-20 |
| PR          | 5241    | PGR    | 2.887                   | 8.2e-20 |

5 10 20

First << 1 2 3 >> Last

Page 1

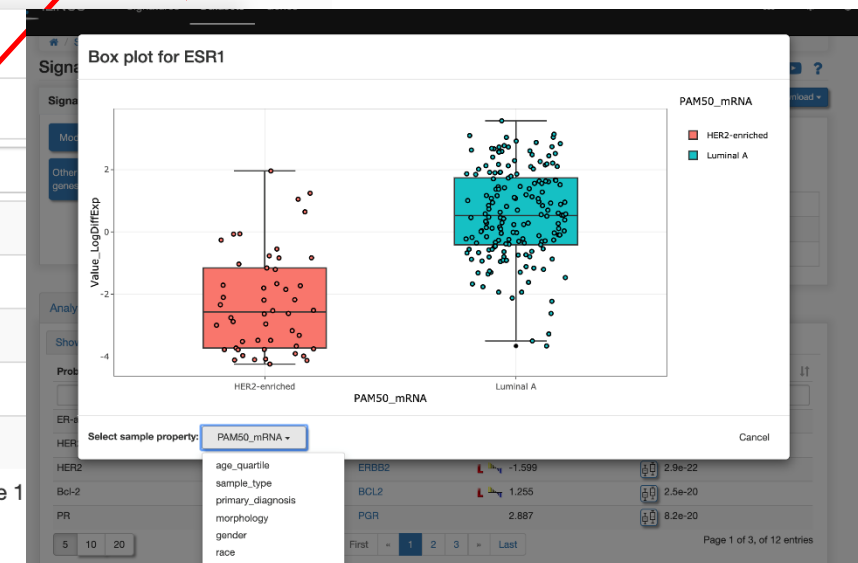



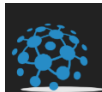

### Subset signatures and datasets with query genes

Show 11 query genes

Genes selected in RPPA dataset analysis

Signatures

All Datasets

LINCS Datasets

14. Search for the BRC RNA-seq dataset in the TCGA collection

#### Find Genomics Datasets

Organism: All | Sample Type: All

Data Type: All | Collection: TCGA

Keyword: brc

Search

#### Found 6 datasets in TCGA

15. Select the dataset

| Organism | Collection | Description                                                                                                                  | Reference                                                                         |    | Analyze |
|----------|------------|------------------------------------------------------------------------------------------------------------------------------|-----------------------------------------------------------------------------------|----|---------|
| human    | TCGA       | 847 Gistic2foc (CNV) breast invasive carcinoma (BRCA) samples from TCGA project. Copy number variati... <a href="#">More</a> | GISTIC2.0 facilitates sensitiv... <a href="#">More</a><br>ID=TCGA_BRCA_Gistic2foc | 11 | Analyze |
| human    | TCGA       | 919 RNA-seq breast invasive carcinoma (BRCA) samples from TCGA project. The data was processed using... <a href="#">More</a> | Collins FS, Barker AD. Mapping... <a href="#">More</a><br>ID=TCGA_BRCA_RNASeqV2   | 11 | Analyze |
| human    | TCGA       | 1215 RNA-seq breast invasive carcinoma (BRCA) samples from TCGA project. Data were downloaded via TC... <a href="#">More</a> | ID=TCGA_BRCA_RNASeqV2_2019                                                        | 11 | Analyze |
| human    | TCGA       | 937 RPPA breast invasive carcinoma (BRCA) samples from TCGA project. Data were downloaded via TCGAbi... <a href="#">More</a> | ID=TCGA_BRCA_RPPA_2019                                                            | 11 | Analyze |

iLINC Signatures Datasets Genes

Select dataset / Dataset Info and Analysis / Pick Genes / Dataset landing page with genes

### Explore and analyze dataset TCGA\_BRCA\_RNASeqV2\_2019 with your gene list

**Dataset Analysis**

- Create a Signature
- Multi-group Analysis
- Other analyses with selected genes

**Dataset Info** **Gene list summary**

|                  |      |
|------------------|------|
| Samples:         | 1215 |
| Selected Probes: | 11   |
| Selected Genes:  | 11   |

Show found genes Download

**Analysis Results** Genes in the dataset Data and metadata Precomputed Signatures

FTreeView Analysis Heatmap Morpheus Heatmap Clustergrammer

iLINC Signatures Datasets Genes

Select Genes / Analyze with submitted list of genes / Dataset info with genes / Create Signature with a gene list

### Creating a signature using gene list in TCGA\_BRCA\_RNASeqV2\_2019

**Select grouping variable**

- PAM50\_mRNA
- treatment: Luminal A
- baseline: HER2-enriched

Create Signature

**Dataset Info** **Gene List** **Histogram**

300  
200  
150  
100  
50  
0

Luminal A HER2-enriched

All Selected

Filter Samples

15. Click to create the signature (ie perform differential expression analysis for the selected 11 genes)

16. Select the sample property (ie factor) that will be used to construct two groups of samples for signature creation

17. Select the value of the factor that will indicate treatment and baseline sample groups

18. Perform differential gene expression analysis between treatment and baseline samples

### Signature created from dataset TCGA\_BRCA\_RNASeqV2\_2019 with a gene list

#### Signature analysis

- Modify the list of selected genes >
- Other analyses with selected genes >

#### Dataset Info

#### Signature Info

|                                                  |                                      |                                     |
|--------------------------------------------------|--------------------------------------|-------------------------------------|
| Number of Samples after Filtering:<br><b>289</b> | Probes after Filtering:<br><b>11</b> | Genes after Filtering:<br><b>11</b> |
| <b>Sample Grouping Factor</b>                    | <b>Treatment</b>                     | <b>Baseline</b>                     |
| PAM50_mRNA                                       | Luminal A                            | HER2-enriched                       |
| <b>Number of samples</b>                         | 231                                  | 58                                  |

19. View the gene by gene analysis results

20. View the hetamap

#### Analysis Results

- Signature Data
- Connected Signatures
- Connected Perturbations

FTreeView Analysis



Heatmap



PCA & t-SNE



Pathway Analysis



Enrichment Analysis



DAVID



ToppFun



GeneMANIA



Reactome



Morpheus Heatmap



L1000CDS2



L1000FWD



X2K



SigNetA



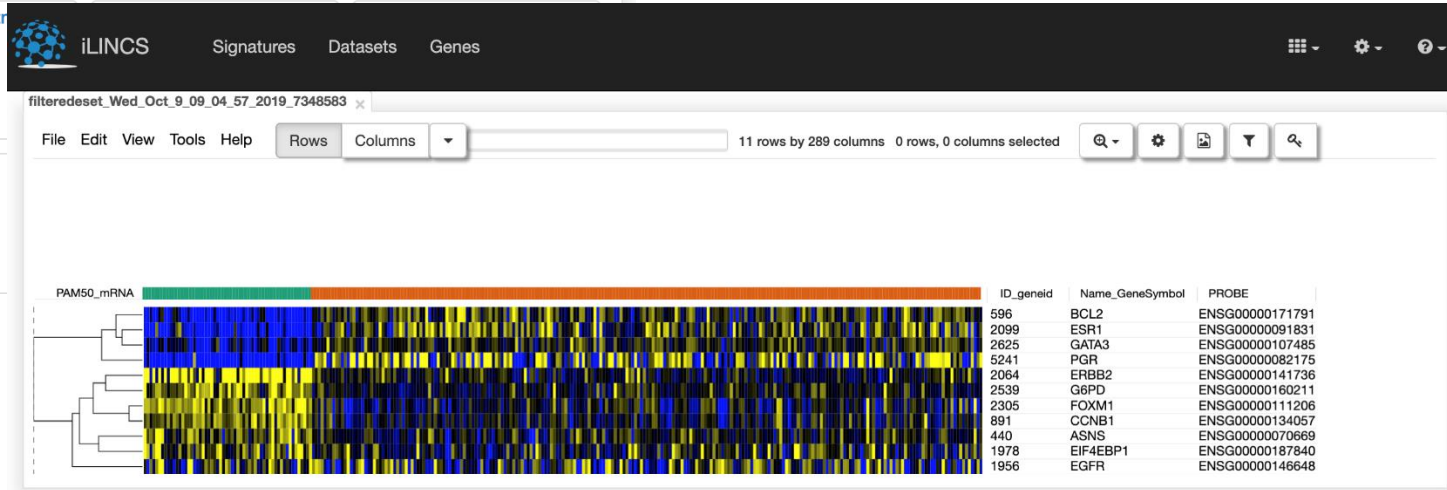

Use Case 3: Proteo-genomics analysis of cancer driver events in breast cancer

The screenshot shows the iLINC'S 'Datasets' workflow. At the top, the navigation bar includes 'Signatures', 'Datasets', and 'Genes'. The 'Datasets' tab is active. Below the navigation, there are tabs for 'All Datasets' and 'LINCS Datasets'. A search section titled 'Find Genomics Datasets' contains filters for 'Organism' (set to 'All'), 'Sample Type' (set to 'All'), 'Data Type' (set to 'All'), and 'Collection' (set to 'TCGA'). A 'Keyword' field contains 'brc'. A blue 'Search' button is located to the right of the keyword field. Below the search filters, a section titled 'Found 6 datasets in TCGA' displays a table of results. The table has columns for 'Organism', 'Collection', 'Description', and 'Reference'. Three rows are visible, each with an 'Analyze' button to its right. Red arrows point from the yellow callout boxes to the 'Datasets' tab, the 'Collection' dropdown, the 'Keyword' field, the 'Search' button, and the 'Analyze' button for the third dataset.

| Organism | Collection | Description                                                                                                                  | Reference                                                                         |
|----------|------------|------------------------------------------------------------------------------------------------------------------------------|-----------------------------------------------------------------------------------|
| human    | TCGA       | 847 Gistic2foc (CNV) breast invasive carcinoma (BRCA) samples from TCGA project. Copy number variati... <a href="#">More</a> | GISTIC2.0 facilitates sensitiv... <a href="#">More</a><br>ID=TCGA_BRCA_Gistic2foc |
| human    | TCGA       | 919 RNA-seq breast invasive carcinoma (BRCA) samples from TCGA project. The data was processed using... <a href="#">More</a> | Collins FS, Barker AD. Mapping... <a href="#">More</a><br>ID=TCGA_BRCA_RNASeqV2   |
| human    | TCGA       | 1215 RNA-seq breast invasive carcinoma (BRCA) samples from TCGA project. Data were downloaded via TC... <a href="#">More</a> | ID=TCGA_BRCA_RNASeqV2_2019                                                        |

21. Start with the Datasets workflow

22. Search Datasets for BRC in the TCGA collection

23. Select the BRC RNA-seq dataset for the analysis

The screenshot shows the 'Dataset Info and Analysis' page for the dataset 'TCGA\_BRCA\_RNASeqV2\_2019'. The navigation bar includes 'Signatures', 'Datasets', and 'Genes'. The 'Datasets' tab is active. The page title is 'Explore and analyze dataset TCGA\_BRCA\_RNASeqV2\_2019'. On the left, there is a 'Dataset Analysis' section with three buttons: 'Create a Signature', 'Multi-group Analysis', and 'Analyze a list of Genes'. The 'Create a Signature' button is highlighted with a red arrow. On the right, there is a 'Dataset Info' section with a 'Description' field containing text about the dataset, and 'Assay type: RNA-seq' and 'Organism: human' fields. Below the 'Dataset Info' section, there are tabs for 'Exploratory tools', 'Data and metadata', and 'Precomputed Signatures'. A red arrow points from the yellow callout box to the 'Create a Signature' button.

24. Initiate the full signature creation

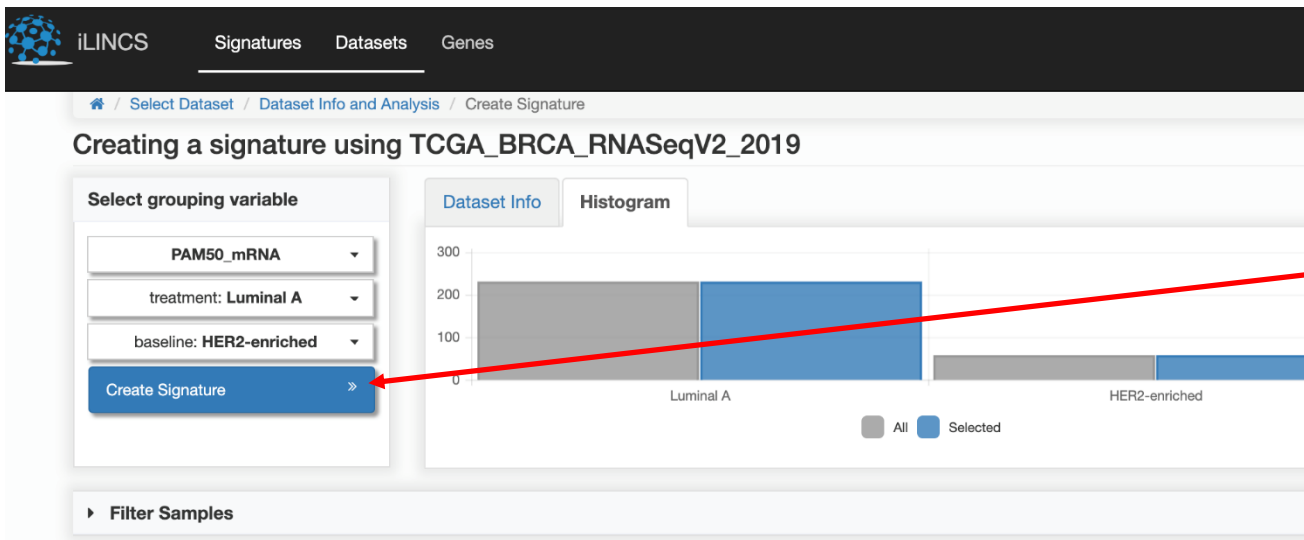

- 25. Select the sample property (ie factor) that will be used to construct two groups of samples for signature creation
- 26. Select the value of the factor that will indicate treatment and baseline sample groups
- 27. Perform differential gene expression analysis between treatment and baseline samples

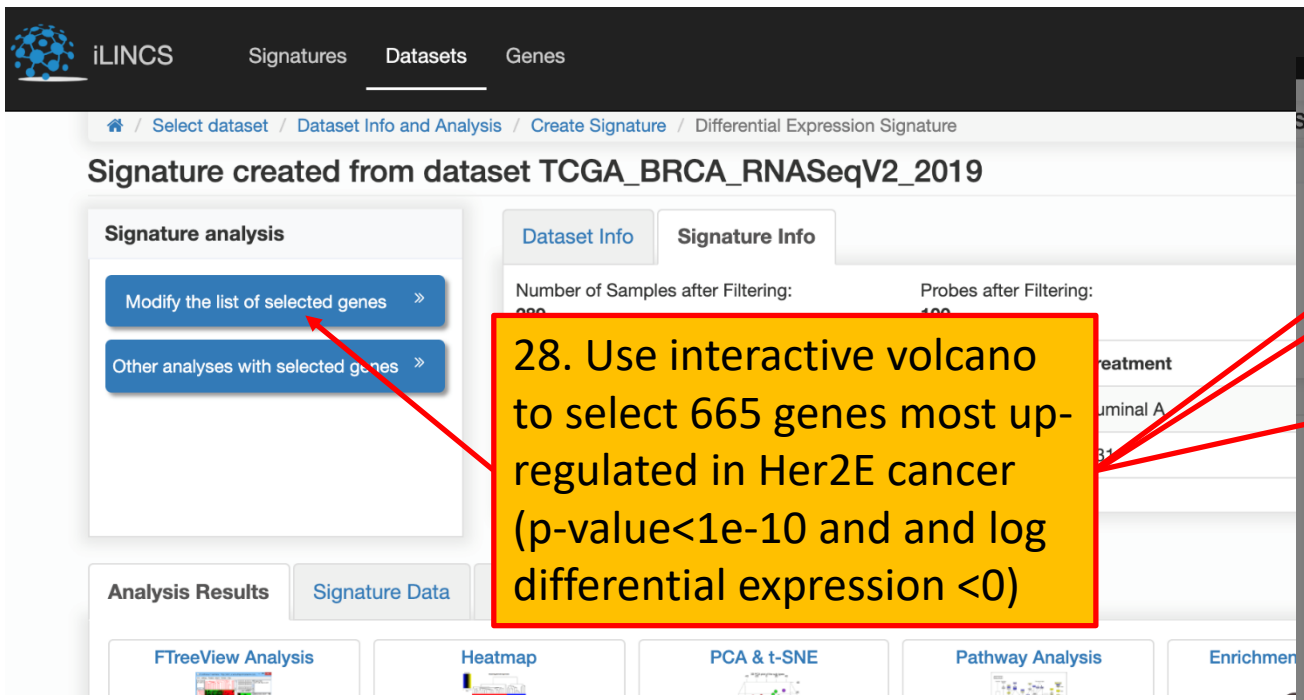

- 28. Use interactive volcano to select 665 genes most up-regulated in Her2E cancer (p-value < 1e-10 and log differential expression < 0)

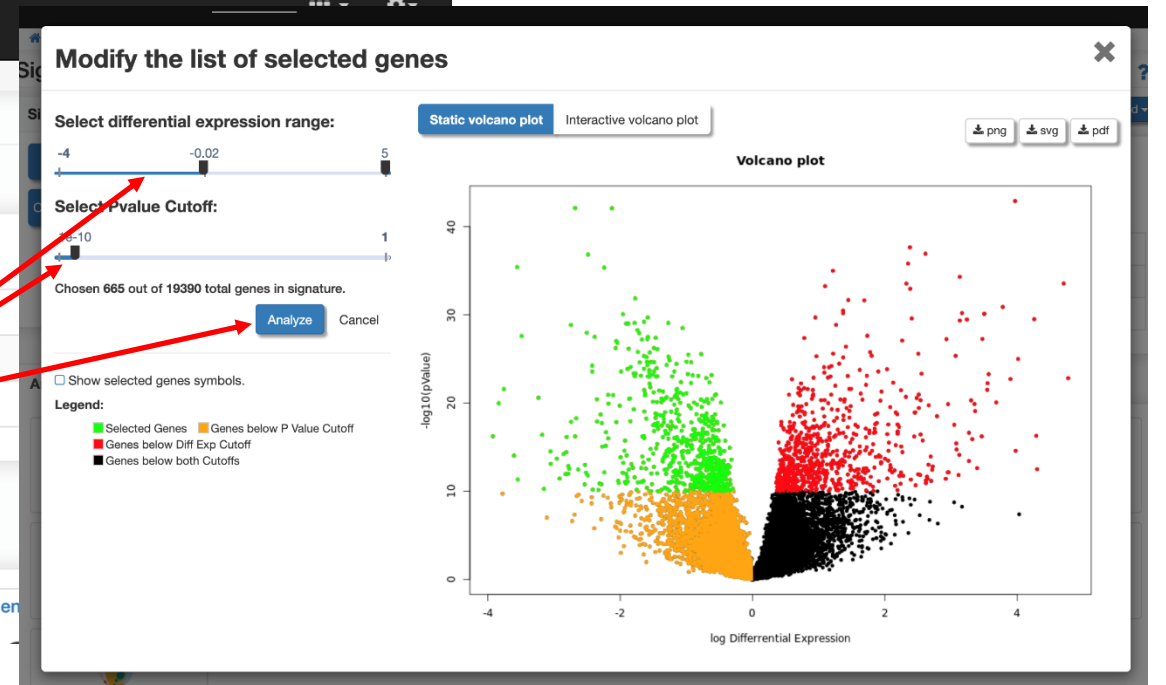

Use Case 3: Proteo-genomics analysis of cancer driver events in breast cancer

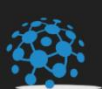

# Signature created from dataset TCGA\_BRCA\_RNASeqV2\_2019

## Signature analysis

Modify the list of selected genes >>

Other analyses with selected genes >>

## Dataset Info

## Signature Info

Number of Samples after Filtering:  
**289**

Probes after Filtering:  
**665**

Genes after Filtering:  
**655**

Differential expression cut offs:

Pvalue cut off:

[Login](#) | [Register](#)

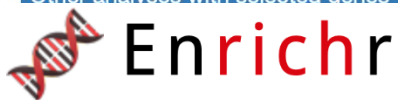

Transcription **Pathways** Ontologies Diseases/Drugs Cell Types Misc Legacy Crowd

**Description** No description available (658 genes)

| Signature     | Baseline      |
|---------------|---------------|
| Her2-enriched | HEP2-enriched |
|               | 58            |

### WikiPathways 2019 Human

- Retinoblastoma Gene in Cancer WP2446
- Cell Cycle WP179
- DNA Replication WP466
- G1 to S cell cycle control WP45
- DNA IR-damage and cellular response via A1

### WikiPathways 2019 Mouse

- DNA Replication WP150
- G1 to S cell cycle control WP413
- Proteasome Degradation WP519
- p53 signaling WP2902
- Glycolysis and Gluconeogenesis WP157

### KEGG 2019 Human

- Cell cycle
- DNA replication
- Proteasome
- Oocyte meiosis
- Fanconi anemia pathway

### ARCHS4 Kinases Coexp

- MELK\_human\_kinase\_ARCHS4\_coexpression
- AURKB\_human\_kinase\_ARCHS4\_coexpression

### KEGG 2019 Mouse

- Cell cycle
- DNA replication

### BioCarta 2016

- CDK Regulation of DNA Replication\_Homo sapiens
- Role of Ran in mitotic spindle regulation\_Homo sapiens

### Enrichment Analysis

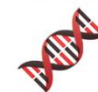

### DAVID

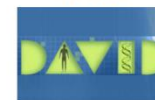

### PiNET

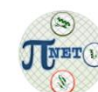

### X2K

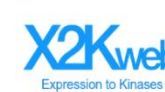

29. Pathway analysis with Enrichr of selected genes upregulated in Her2E tumors



Signature created from dataset TCGA\_BRCA\_RNASeqV2\_2019

**Signature analysis**

Modify the list of selected genes >>

Other analyses with selected genes >>

**Dataset Info** **Signature Info** Download

Number of Samples after Filtering: **289** Probes after Filtering: **665** Genes after Filtering: **655**

Differential expression cut offs: below: **-0.01** above: **5** Pvalue cut off: **1e-10**

| Sample Grouping Factor   | Treatment | Baseline      |
|--------------------------|-----------|---------------|
| PAM50_mRNA               | Luminal A | HER2-enriched |
| <b>Number of samples</b> | 231       | 58            |

30. Connectivity analysis with LINCS CP perturbation signatures

**Analysis Results** **Signature Data** **Connected Signatures** **Connected Perturbations**

Use complete signature (19390) Use selected genes (665)

| Signature Library                                                             | Common genes |
|-------------------------------------------------------------------------------|--------------|
| <input type="checkbox"/> LINCS consensus gene (CGS) knockdown signatures      | 973          |
| <input type="checkbox"/> LINCS gene overexpression signatures                 | 973          |
| <input checked="" type="checkbox"/> LINCS chemical perturbation signatures    | 973          |
| <input type="checkbox"/> LINCS targeted proteomics signatures                 | 85           |
| <input type="checkbox"/> Disease related signatures                           | 19149        |
| <input type="checkbox"/> ENCODE transcription factor binding signatures       | 19141        |
| <input type="checkbox"/> Connectivity Map signatures                          | 11565        |
| <input type="checkbox"/> DrugMatrix signatures                                | 13086        |
| <input type="checkbox"/> Transcriptional signatures from EBI Expression Atlas | 18952        |



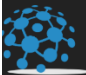

Cancer therapeutics response signatures

17042

Pharmacogenomics transcriptional signatures

18521

10201 of LINCS chemical perturbagen signatures

Analyze

Selection

My list

Download

Clear filters

Stats

Top 5 All Signatures

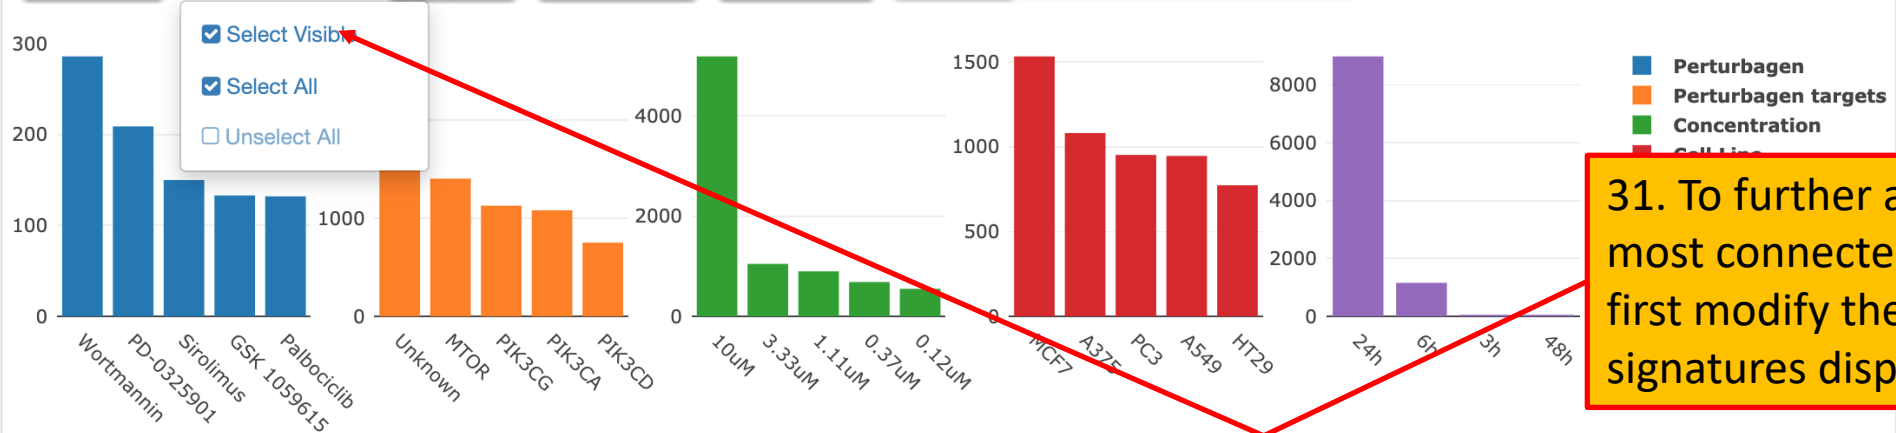

The connectivity analysis provides the sorted list of most statistically significantly correlated signatures.

31. To further analyze top 100 most connected CP signatures, first modify the number of signatures displayed.

| Signature Id                            | Perturbagen | Perturbagen targets | Concentration | Cell Line | Time | Concordance |
|-----------------------------------------|-------------|---------------------|---------------|-----------|------|-------------|
| <input type="checkbox"/> LINCSCP_135677 | KPT-330     | XPO1                | 0.87uM        | MCF7      | 24h  | 0.537       |
| <input type="checkbox"/> LINCSCP_139907 | Palbociclib | CCND1   CDK4   ...  | 10uM          | MCF7      | 24h  | 0.532       |
| <input type="checkbox"/> LINCSCP_30538  | BMS-536924  | IGF1R               | 10uM          | MCF7      | 24h  | 0.522       |
| <input type="checkbox"/> LINCSCP_139908 | Palbociclib | CCND1   CDK4   ...  | 3.33uM        | MCF7      | 24h  | 0.518       |
| <input type="checkbox"/> LINCSCP_32534  | WZ 3146     | EGFR                | 10uM          | MCF7      | 24h  | 0.516       |

32. Then click on "Select Visible" signatures in the "Selection" drop down menu

5 25 50 100

First « 1 2 3 4 5 » Last

Page 1 of 2041, of 10201 entries

32. Select "Group Analysis" on the "Analysis" drop-down menu.

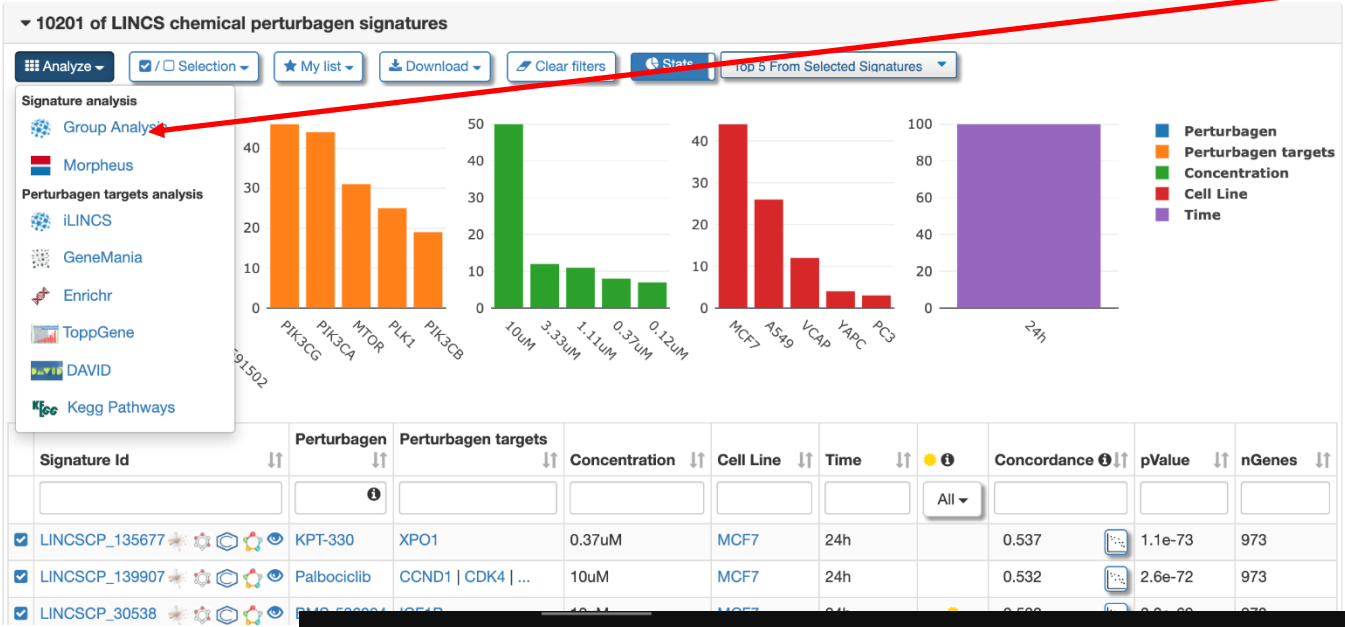

33. Confirm the selected signatures and the default number of most differentially expressed genes to be used from each signature. The number of signature is 101, because the original Luminal A vs Her2E signature is also included in the analysis.

### Select Signatures for Group Analysis

Select Visible Select All Unselect All Remove Selected Download Selected

| Signature ID                                       | Library                               | Cell Line | Factor | Perturbagen            |
|----------------------------------------------------|---------------------------------------|-----------|--------|------------------------|
| <input checked="" type="checkbox"/> LINCSCP_11733  | LINCS chemical perturbagen signatures | BT20      |        | Palbociclib            |
| <input checked="" type="checkbox"/> LINCSCP_122796 | LINCS chemical perturbagen signatures | HT29      |        | Milciclib (PHA-848125) |
| <input checked="" type="checkbox"/> LINCSCP_123195 | LINCS chemical perturbagen signatures | HT29      |        | MLN-0128               |
| <input checked="" type="checkbox"/> LINCSCP_128841 | LINCS chemical perturbagen signatures | HUVEC     |        | STK219801              |
| <input checked="" type="checkbox"/> LINCSCP_129999 | LINCS chemical perturbagen signatures | LNCAP     |        | ZSTK 474               |

5 10 50 First « 1 2 3 4 5 » Last Page 1 of 39, of 193 entries

Include uploaded signature in the analysis: processedSig\_Mon\_Oct\_14\_14\_20\_00\_2019\_9627926.xls

Number of genes per signature: 50 Analyze 101 signatures Cancel

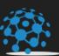

### Signature Group Analysis

34. To view the heatmap of expression changes in 101 signatures.

Signature ID Library Organism Tissue Cell Line Factor Perturbation Treatment Baseline

LINCSCP\_11733 LINCSCP\_122796 LINCSCP\_123195 LINCSCP\_128841 LINCSCP\_129999

Analysis include uploaded signature: processedSig\_Mon\_Oct\_14\_14\_20\_01

Number of top genes per signature: 50  
Genes: 566

Generated results: Gene Clusters, Signatures Heatmap, Morpheus Signatures H

filteredeseet\_Mon\_Oct\_14\_2019\_14\_48\_31\_3132066

File Edit View Tools Help Rows Columns

height: 1.25 depth: 4.00 # of leaf nodes: 54.00

concentration cellLine time treatment

Export Selection

AURKA, CCNB1, CDC20, UBE2C, CDK1, BIRC5, CCNA2, KIF20A, CCNB2, TOP2A, NUSAP1, SMC4, DCK, CDCA4, HPRT1, MAP3K4, CHEK2, SUV39H1, BRCA1, POLE 2, TIMELESS, USP1, NUP62, AURKB, RFC2, MYBL2, CDC25A, NUP85, MELK, HA T1, PCNA, LIG1, SUZ12, JPT2, BUB1B, NCAPD2, DNMT1, TMEM97, C5, TOPBP 1, MCM3, TMEM109, MSH6, MPZL1, PGRMC1, PRCP, TGFB2, PCBD1, EPB41L2, AKR7A2, SMARCC1, RNPS1, TBC1D31, CHP1

iLINCS search GeneMANIA PINET

Enrichr Interactive and collaborative gene list enrichment tool.

ToppGene Portal for gene list enrichment analysis and candidate gene prioritization.

DAVID The Database for Annotation, Visualization and Integrated Discovery.

OK Cancel

35. To perform pathway enrichment analysis for a set of co-expressed genes, select the cluster.

36. Right click on the (invisible in this case) column of selected gene symbols, end select "Export" on the context specific menu.

37. Submit the genes to Enrichr

Sort Heat Map Ascending ↑  
Sort Heat Map Descending ↓  
Sort Heat Map Descending/Ascending

Move To Top  
Annotate Selection  
Copy  
Export  
Invert Selection  
Select All  
Clear Selection

Enrichr

Transcription Pathways Ontologies Diseases/Drugs Cell Types Misc Legacy Crowd

Description No description available (54 genes)

WikiPathways 2019 Human  
Retinoblastoma Gene in Cancer WP2446  
Cell Cycle WP179  
G1 to S cell cycle control WP45  
DNA Damage Response WP707  
miRNA Regulation of DNA Damage Respons

WikiPathways 2019 Mouse  
G1 to S cell cycle control WP413  
Mismatch repair WP1257  
DNA Replication WP150  
p53 signaling WP2902  
PluriNetWork WP1763

KEGG 2019 Human  
Cell cycle  
Cellular senescence  
DNA replication  
Progesterone-mediated oocyte maturation  
Mismatch repair
